# Supplementary material for: Overestimation of the effect of climatic warming on spring phenology due to misrepresentation of chilling
Source: Nat Commun. 2020 Oct 2;11:4945. doi: 10.1038/s41467-020-18743-8 (PMC7532433; doi:10.1038/s41467-020-18743-8)
Supplement: Supplementary file 1 — Supplementary Information [file 41467_2020_18743_MOESM1_ESM.pdf]

## **Supplementary Information**

**Overestimation of the effect of climatic warming on spring phenology  
due to misrepresentation of chilling**

Wang et al.





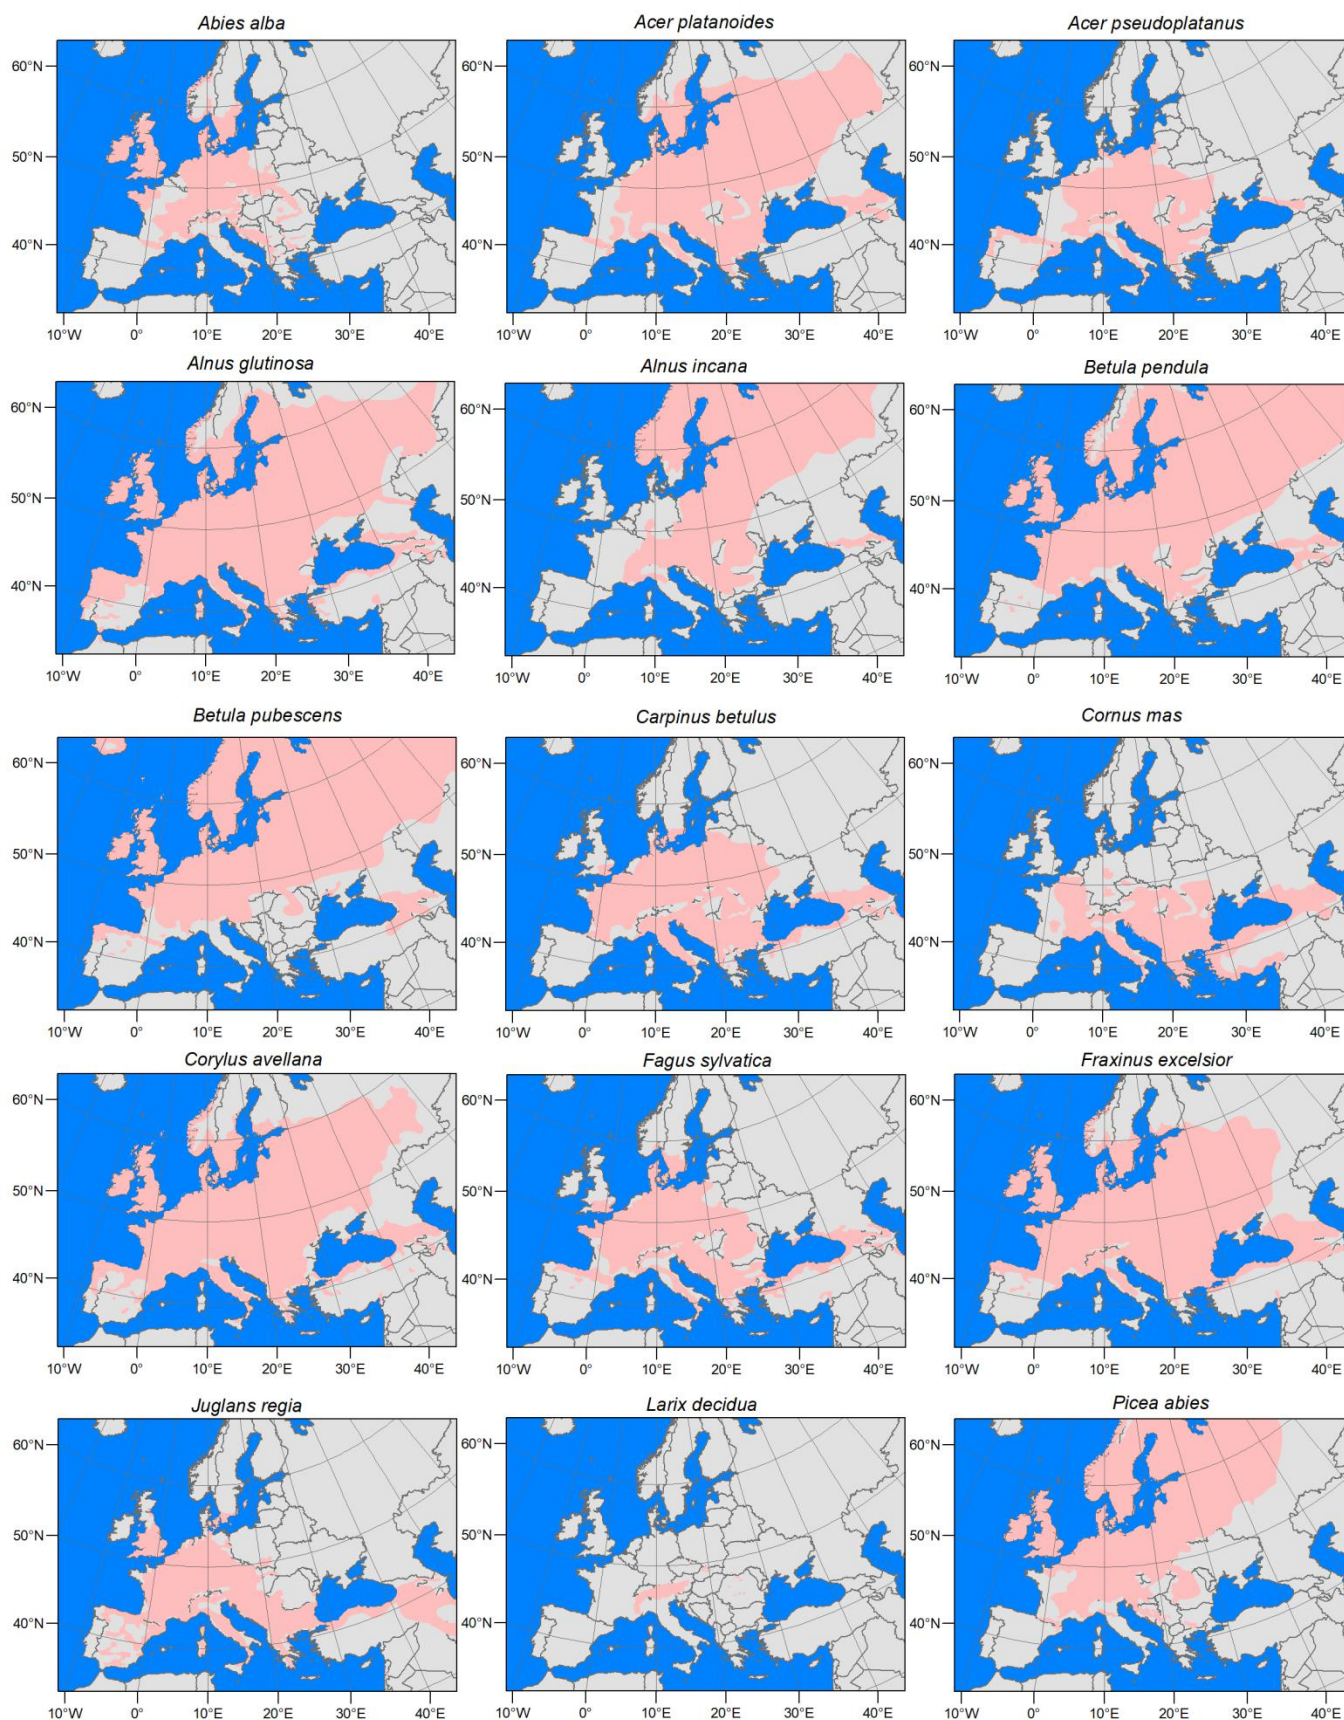

Supplementary Fig. 2 partial

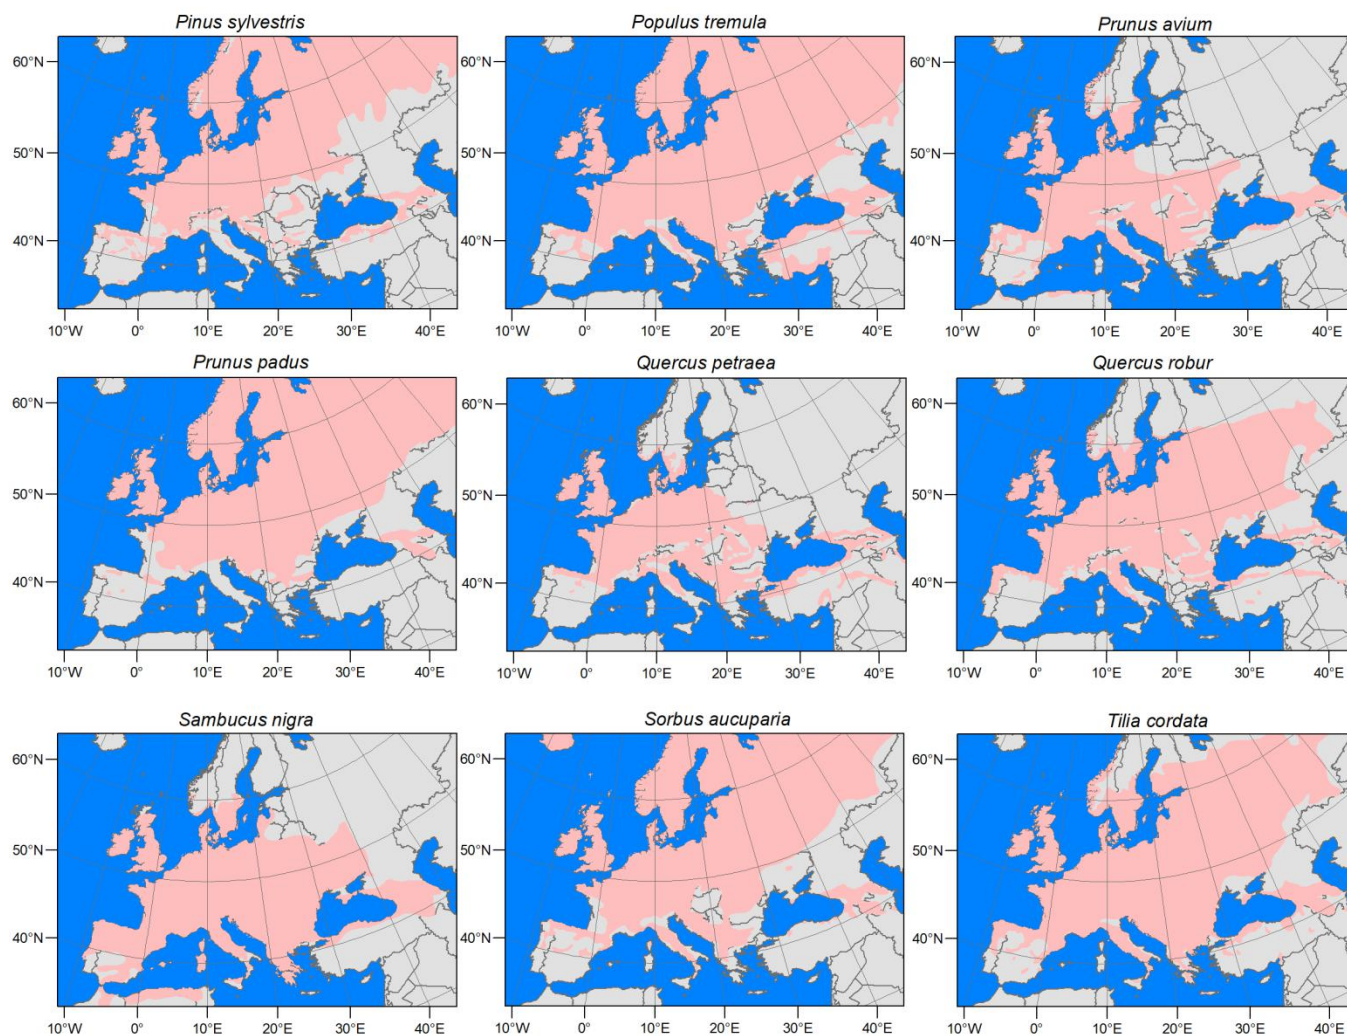

**Supplementary Fig. 2** | Distribution of 24 main European woody species following the negative relationship between chilling accumulation and heat requirement. These species include the most dominant forest tree species in Europe, whose distribution area covers various habitats ranging from mountainous regions in southern and Eastern Europe to lowlands in central and northern Europe. The distribution data are from chorological maps for the main European woody species (<https://doi.org/10.1016/j.dib.2017.05.007>)

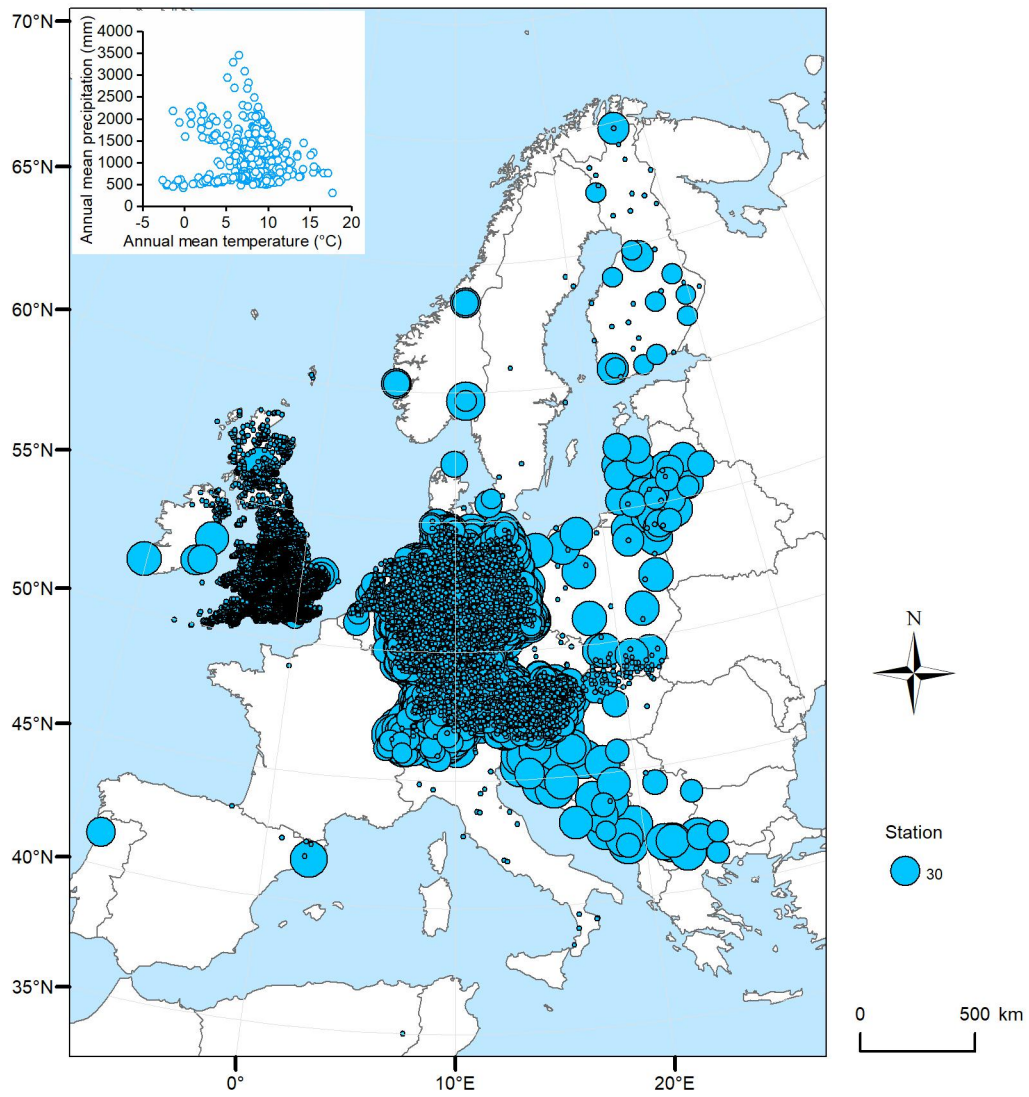

**Supplementary Fig. 3** | Distribution of the phenological stations. Circle size: duration of phenological records (number of years) at each station. The left corner shows the annual mean temperature and precipitation of each phenological stations.

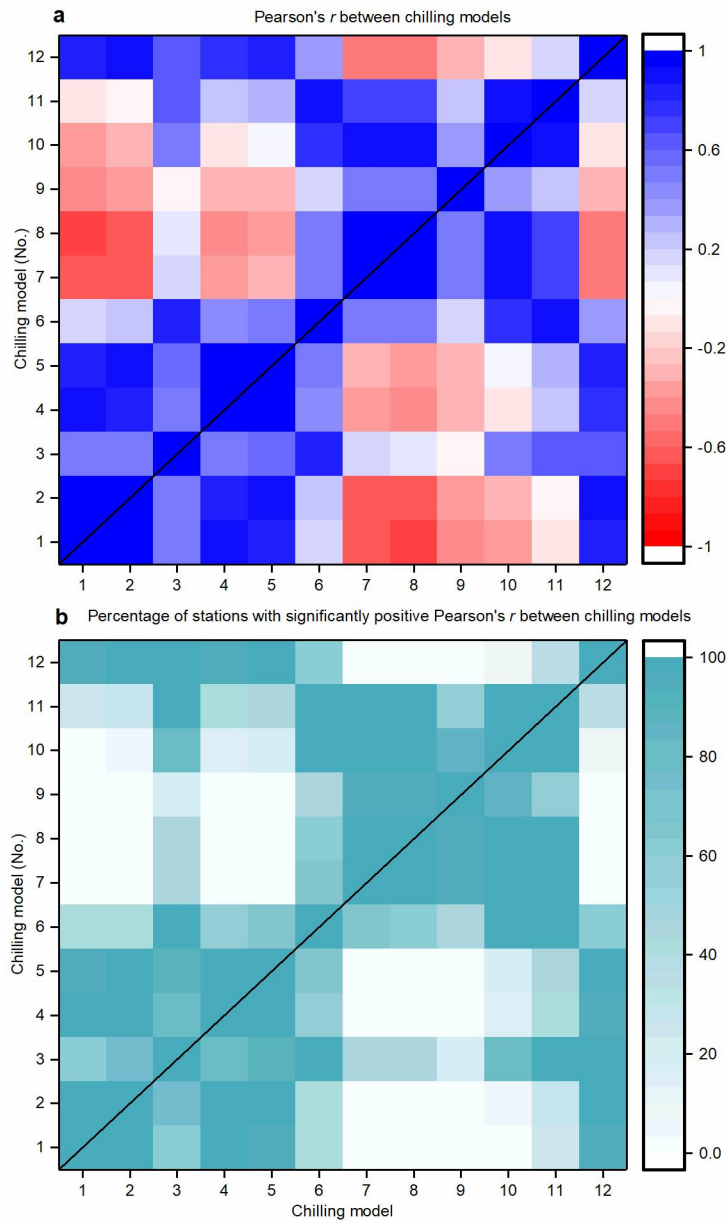

**Supplementary Fig. 4** | Correlations between chilling accumulations calculated by using the different chilling models. **a**, Pearson's  $r$  among chilling accumulations calculated by each pair of chilling models averaged from all phenological stations in Supplementary Fig. 3. **b**, Percentage of stations with significantly positive Pearson's  $r$  ( $p < 0.05$ ) between chilling models.

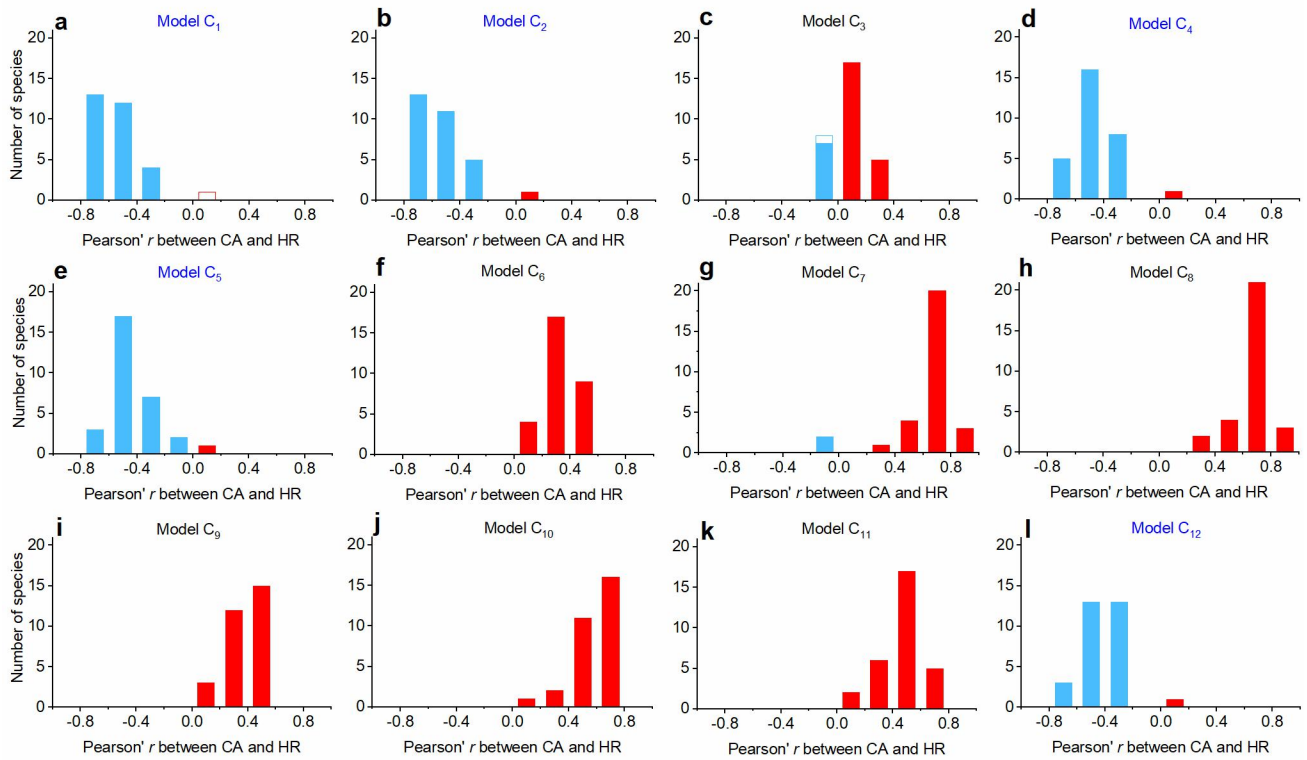

**Supplementary Fig. 5** | Frequency distribution of Pearson's  $r$  between chilling accumulation and heat requirement.

Chilling accumulation (CA) from 1 November to the onset of spring events was calculated for each species using the 12 chilling models (a-l), and the heat requirement (HR) was calculated as accumulated temperatures  $>0$  °C from 1 January to the onset of spring events. Pearson's  $r$  between CA and HR was calculated using all records. The blue and red bars represent negative and positive Pearson's  $r$ , respectively. Solid bars indicate a significant Pearson's  $r$  at  $p < 0.05$  (two-sided  $t$ -test). The significantly negative Pearson's  $r$  between CA and HR were found in most species for Models C<sub>1</sub>, C<sub>2</sub>, C<sub>4</sub>, C<sub>5</sub>, and C<sub>12</sub>, which supported the physiological assumption in Fig. 1.

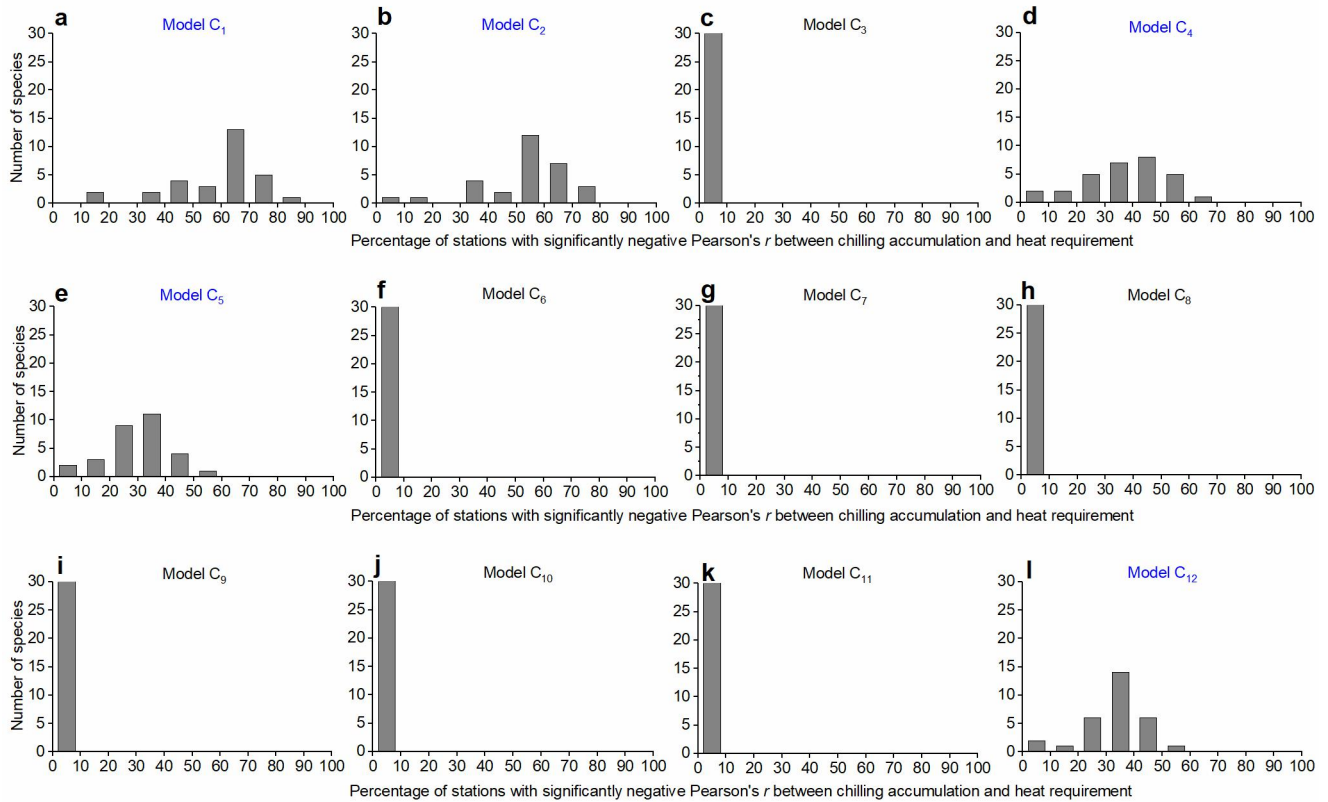

**Supplementary Fig. 6** | Frequency distribution of the percentage of stations with significantly ( $p < 0.05$ ) negative Pearson's  $r$  between chilling accumulation and the heat requirement. Chilling accumulation (CA) from 1 November to the onset of spring event was calculated for each species using the 12 chilling models (a-l), and the heat requirement (HR) was calculated as accumulated temperatures  $> 0$  °C from 1 January to the onset of spring events. Pearson's  $r$  between CA and HR was calculated for each station that had at least 15 years of observations, and the percentages of significantly negative Pearson's  $r$  ( $p < 0.05$ , two-sided  $t$ -test) were determined for each species. CA and HR were significantly and negatively correlated at  $> 30\%$  of the stations in most species for Models C<sub>1</sub>, C<sub>2</sub>, C<sub>4</sub>, C<sub>5</sub>, and C<sub>12</sub>.

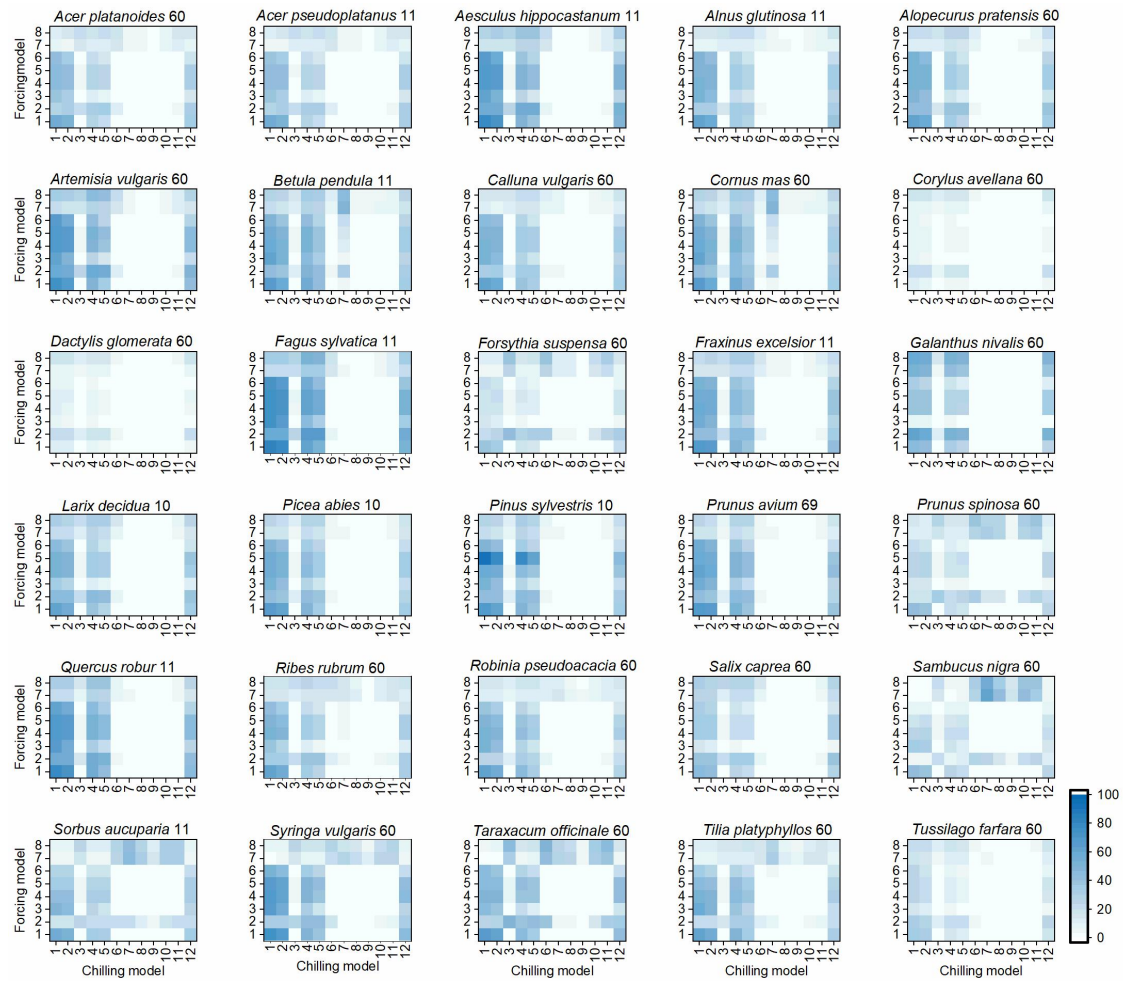

**Supplementary Fig. 7** | Percentage of stations with significantly negative Pearson's  $r$  between chilling accumulation and the heat requirement. Chilling accumulation (CA) from 1 November to the onset of spring events was calculated for each species/event using the 12 chilling models, and the heat requirement (HR) from 1 January to the onset of spring events was calculated using the 8 forcing models. Pearson's  $r$  between CA and HR was calculated for each station that had at least 15 years of observations. The percentage of stations with significantly negative Pearson's  $r$  ( $p < 0.05$ , two-sided  $t$ -test) between CA and HR is shown for each species/event. The events are coded using the BBCH scale: 10, first leaves separated; 11, first leaves unfolded; 60, first flowers open; and 69, end of flowering.

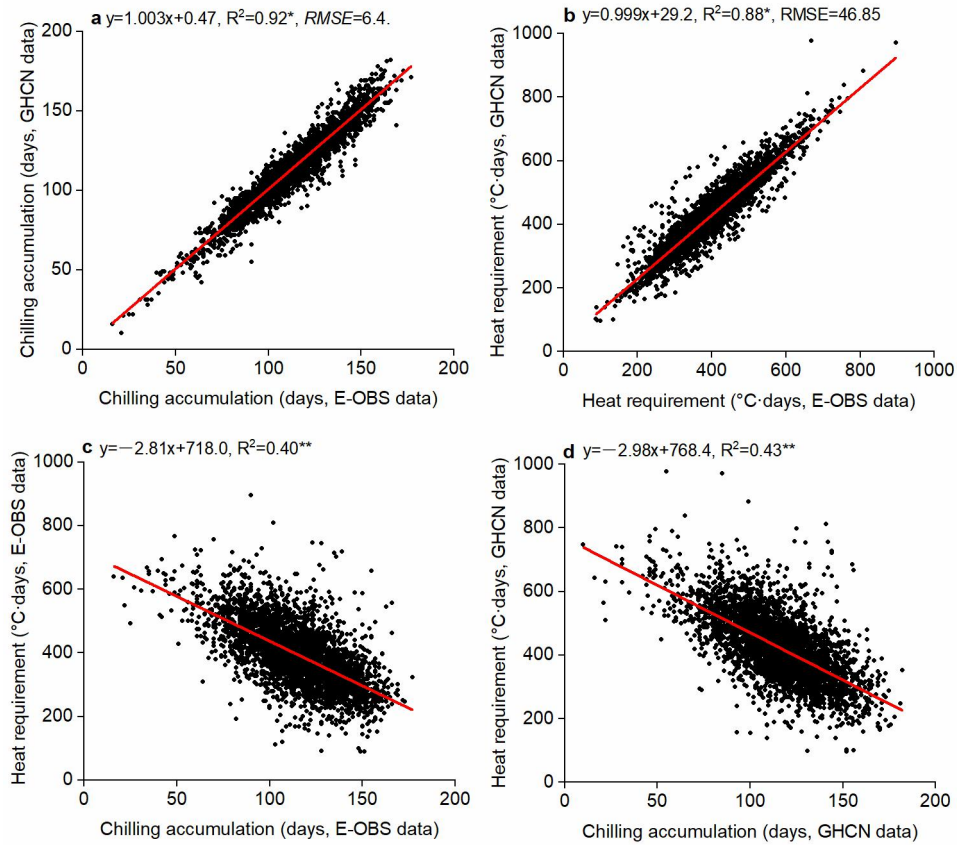

**Supplementary Fig. 8** | Comparison between chilling accumulation (CA) and heat requirement

(HR) for leaf-out of *Betula pendula* based on two temperature dataset. CA was calculated based on model C<sub>1</sub> accumulated from 1 November in the previous year to the leaf-out date. HR was calculated based on a commonly used forcing model (integrating daily mean temperatures  $>0^{\circ}\text{C}$  from 1 January to leaf-out date). The CA and HR in corresponding grid cells of E-OBS data and at corresponding stations of GHCN data are compared. **a**, CA between two datasets; **b**, HR between two datasets; **c**, CA-HR relationship for E-OBS data; **d**, CA-HR relationship for GHCN data. Root-mean-square error (RMSE) between the two datasets is shown. Also, the linear regression line (in red) and its  $R^2$  are shown. A two-sided  $F$ -test is used to test whether the slope equals zero.  $n=3965$ . \*\*:  $p<0.01$ .

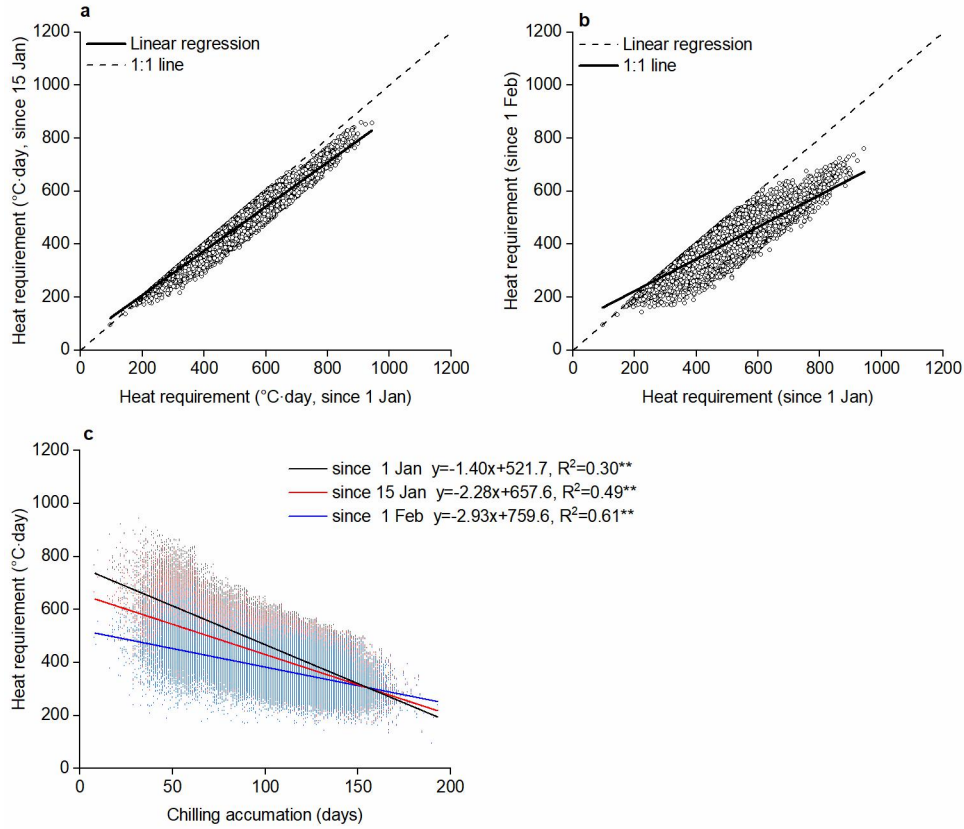

**Supplementary Fig. 9** | Comparison between heat requirement (HR) for leaf-out of *Betula pendula* based on different starting dates of temperature accumulation. HR was calculated based on a commonly used forcing model (integrating daily mean temperatures  $>0$  °C). **a**, HR accumulated from 1 January vs. from 15 January; **b**, HR accumulated from 1 January vs. from 1 February; **c**, chilling accumulation(CA)-HR relationship for different starting dates of temperature accumulation. CA was calculated based on model  $C_1$  accumulated from 1 November in the previous year to the leaf-out date. The linear regression lines are shown ( $n=3965$ ). A two-sided  $F$ -test is used to test whether the slope equals zero. \*\*:  $p < 0.01$ .

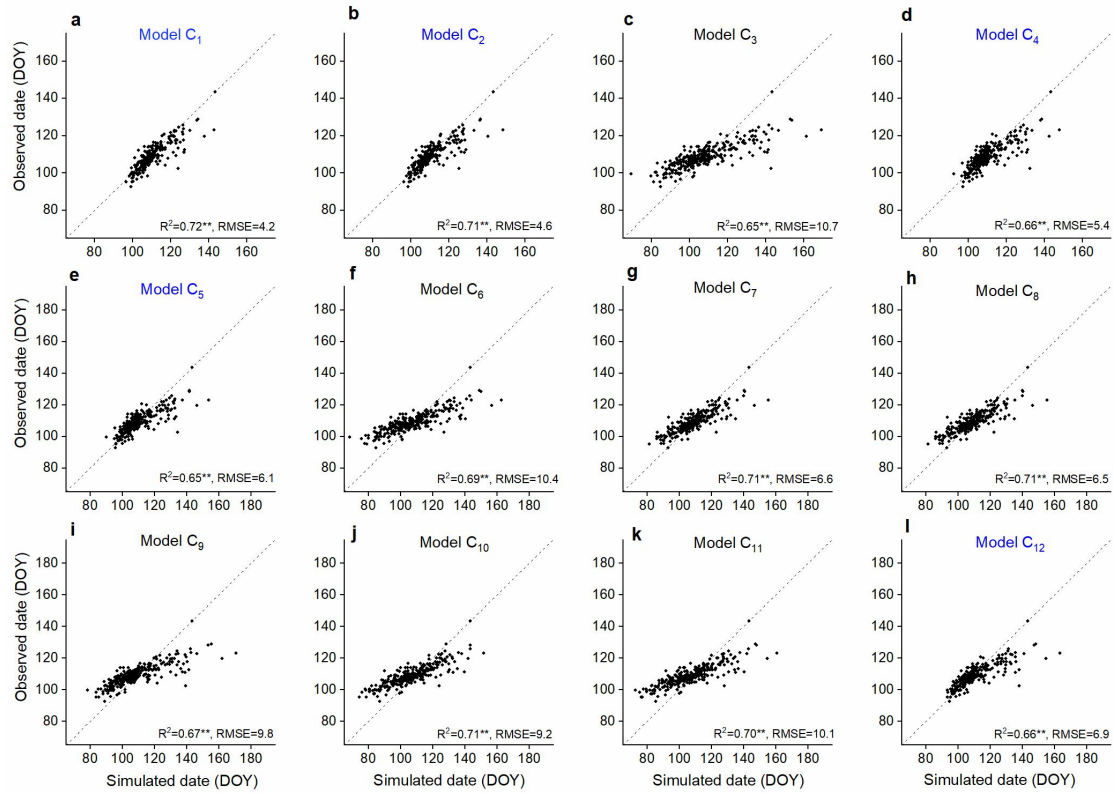

**Supplementary Fig. 10** | Comparisons between observed and simulated leaf-out date of *Betula pendula* averaged from 1980 to 2018. Each point represents a  $0.5^\circ \times 0.5^\circ$  grid ( $n=303$ ). Spring phenological events were simulated using the linear regression between chilling accumulations based on the 12 chilling models (from 1 November to the onset of spring events) and the heat requirement (the accumulated temperature  $>0^\circ\text{C}$  from 1 January to the onset of spring events) for all records (1951-2018). The past phenological change over 1980-2018 was simulated by using the E-OBS data. DOY, day of the year. The dashed line represents the 1:1 line.  $R^2$ : goodness of fit. A two-sided  $F$ -test is used to test whether the slope equals zero. \*\*:  $p < 0.01$ . RMSE: root-mean-square error (days).

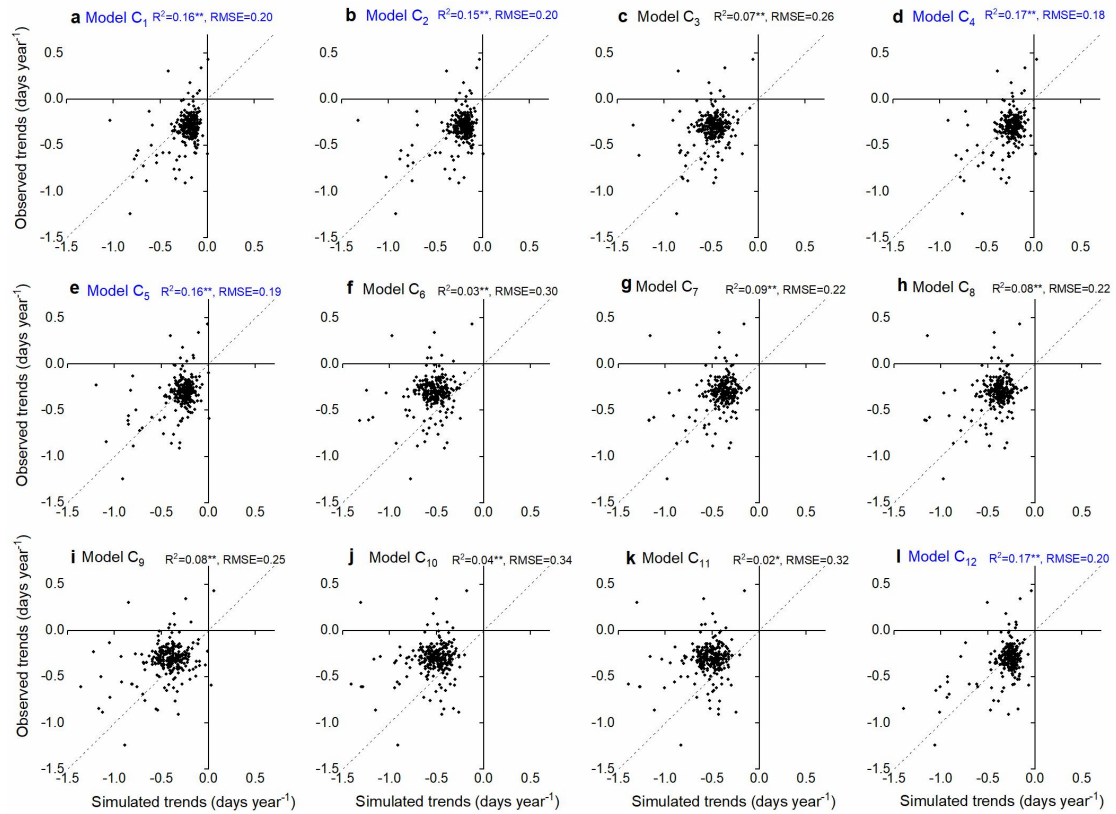

**Supplementary Fig. 11** | Comparisons between observed and simulated trends in the leaf-out date of *Betula pendula* from 1980 to 2018. Trends was estimated as the slope of the linear regression of spring phenology against year for each  $0.5^\circ \times 0.5^\circ$  grid with at least 15-year observation data (n=265). Spring phenological events were simulated using the linear regression between chilling accumulations based on the 12 chilling models (from 1 November to the onset of spring events) and the heat requirement (the accumulated temperature  $>0^\circ\text{C}$  from 1 January to the onset of spring events) for all records (1951-2018). The past phenological change over 1980-2018 was simulated by using the E-OBS data. The dashed line represents the 1:1 line.  $R^2$ : goodness of fit. A two-sided  $F$ -test is used to test whether the slope equals zero. \*\*:  $p < 0.01$ . \*:  $p < 0.05$ . RMSE: root-mean-square error in days year<sup>-1</sup>.

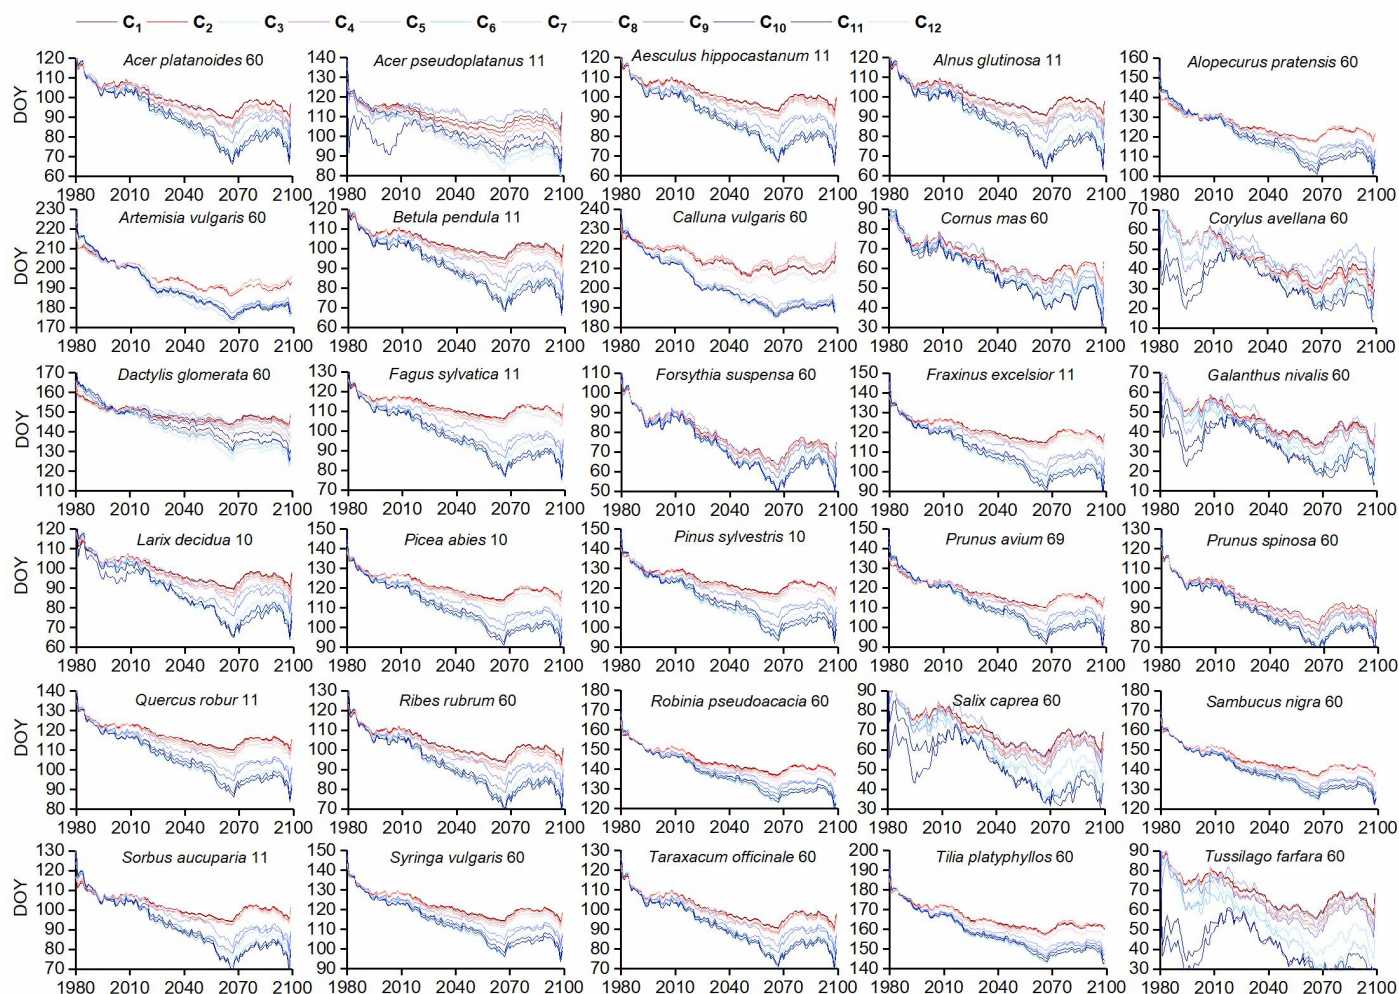

**Supplementary Fig. 12** | Changes in spring phenology from 2019 to 2099 under the RCP 4.5 scenario. Spring phenological events were simulated using the linear regression between chilling accumulations based on the 12 chilling models (from 1 November to the onset of spring events) and the heat requirement (the accumulated temperature  $>0^{\circ}\text{C}$  from 1 January to the onset of spring events) for all records (1951-2018). The past phenological change over 1980-2018 was also simulated by using the E-OBS data. Each panel represents a spring event for one species. The events are coded using the BBCH scale: 10, first leaves separated; 11, first leaves unfolded; 60, first flowers open; and 69, end of flowering. DOY, day of the year. The dates of the spring phenological events were smoothed using an 11-year moving average. The red lines represent valid models ( $C_1$ ,  $C_2$ ,  $C_4$ ,  $C_5$ , and  $C_{12}$ ), and the blue lines represent invalid models.

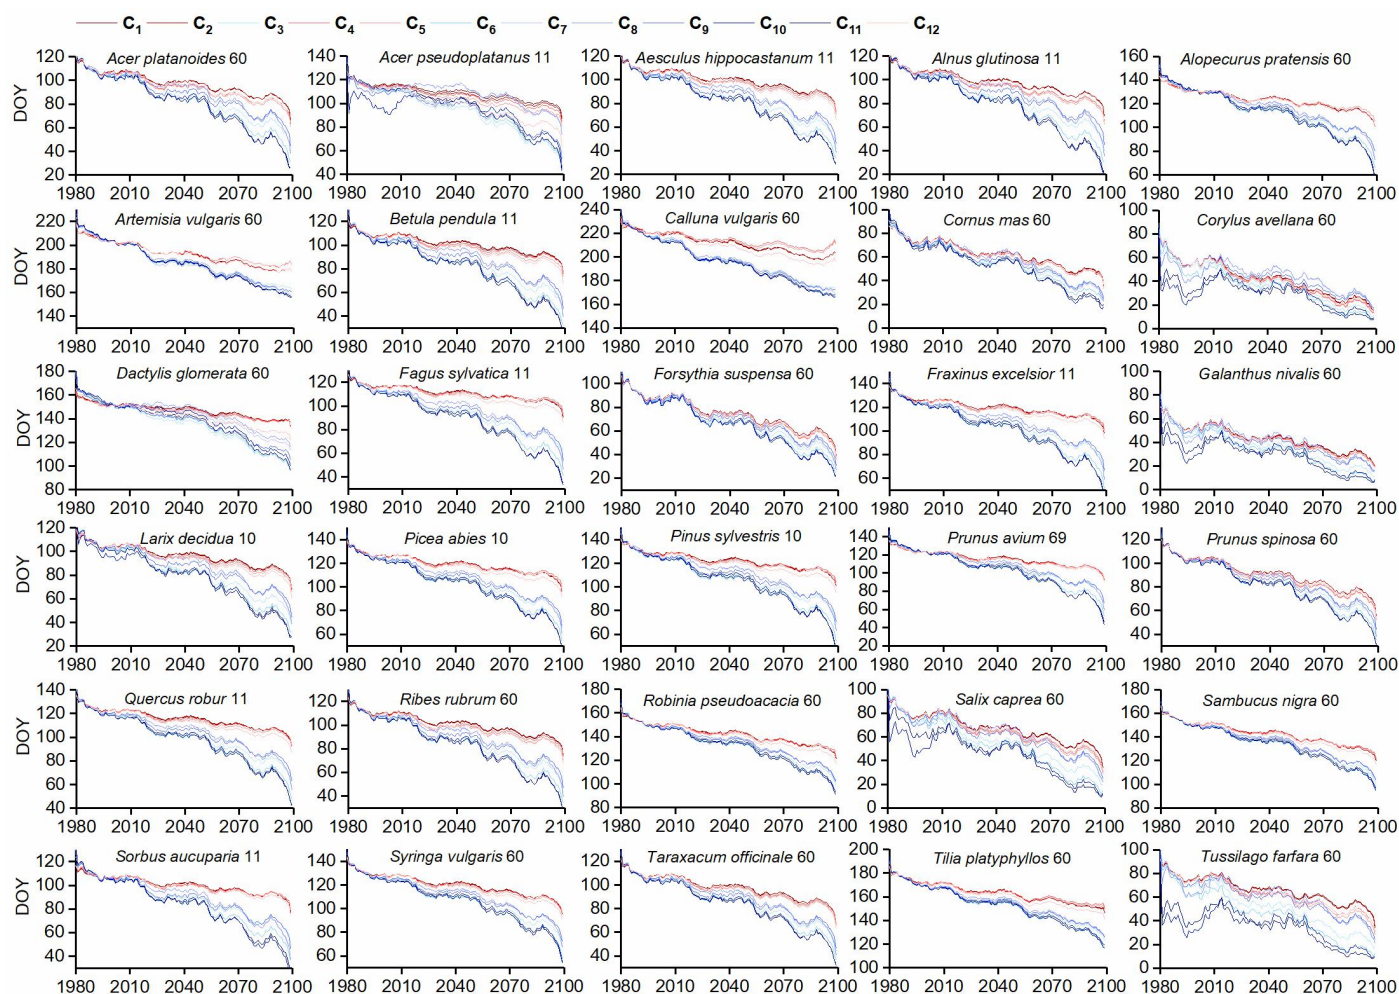

**Supplementary Fig. 13** | Changes in spring phenology from 2012 to 2099 under the RCP 8.5 scenario. Spring phenological events were simulated using the linear regression between chilling accumulations based on the 12 chilling models (from 1 November to the onset of spring events) and the heat requirement (the accumulated temperature  $>0^{\circ}\text{C}$  from 1 January to the onset of spring events) for all records (1951-2018). The past phenological change over 1980-2018 was also simulated by using the E-OBS data. Each panel represents a spring event for one species. The events are coded using the BBCH scale: 10, first leaves separated; 11, first leaves unfolded; 60, first flowers open; and 69, end of flowering. DOY, day of the year. The dates of the spring phenological events were smoothed using an 11-year moving average. The red lines represent valid models ( $C_1$ ,  $C_2$ ,  $C_4$ ,  $C_5$ , and  $C_{12}$ ), and the blue lines represent invalid models.

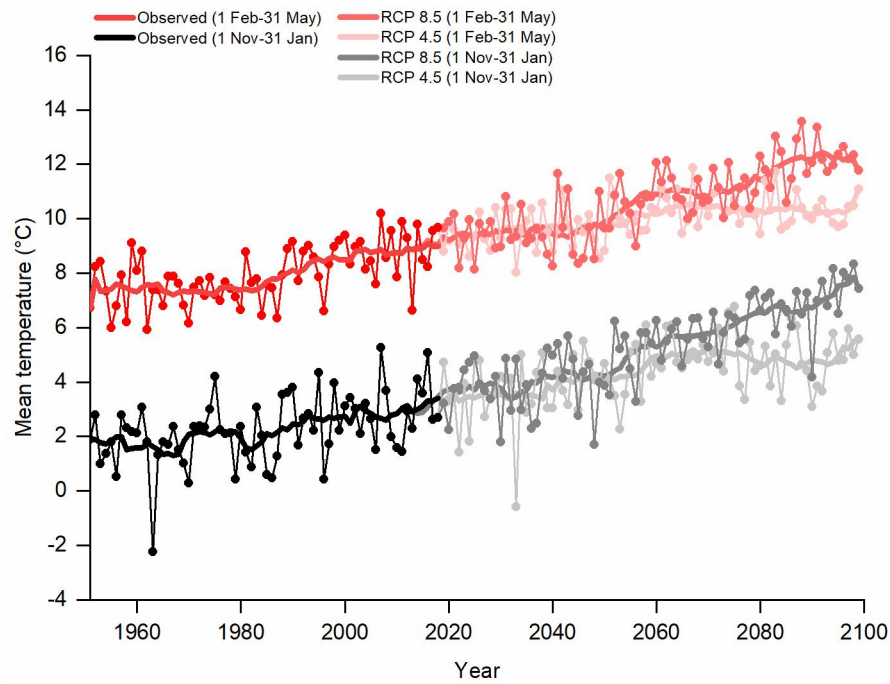

**Supplementary Fig. 14** | Temperature change in Europe from 1951 to 2099. For the past period (1951-2018), temperature data is from the E-OBS data. For future climatic data (2019-2099), we used the data simulated by the HADGEM2-ES model. The temperature during the chilling period (black line) is averaged from the previous 1 November to 31 January, while the temperature during the forcing period (red line) is averaged from 1 February to 31 May. The bold lines show the result of the 11-year moving average.

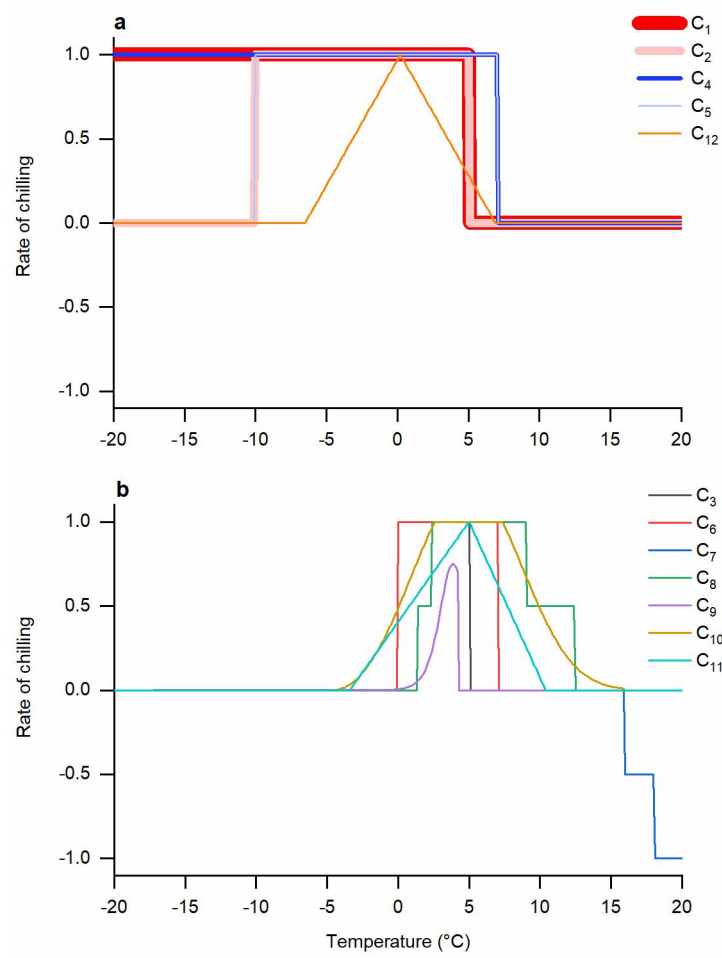

**Supplementary Fig. 15** | Response of the rate of chilling for the 12 chilling models. **a**, Valid models. **b**, Invalid models.

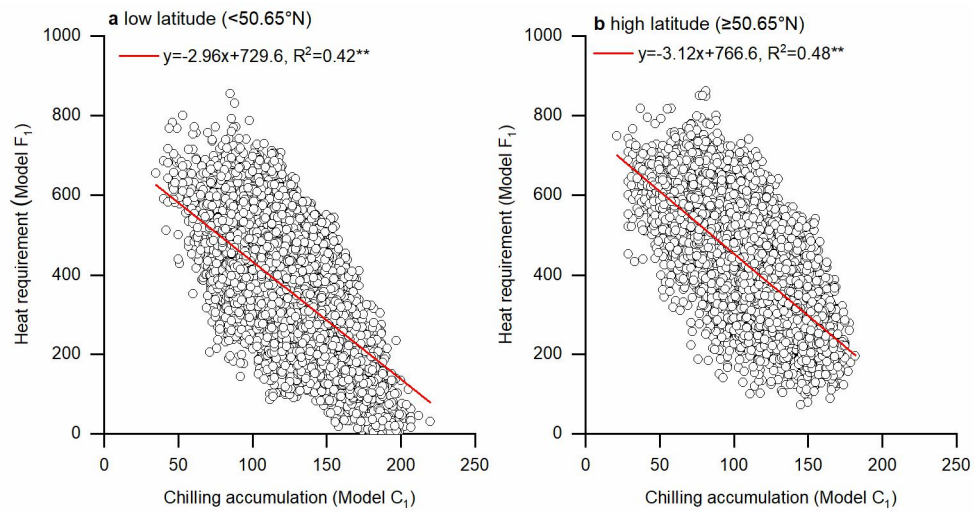

**Fig. 16** Relationship between chilling accumulation (CA) and heat requirement (HR) for leaf-out of *Betula pendula* at different latitudes. **a**, at latitudes lower than  $50.65^{\circ}\text{N}$ . **b**, at latitudes higher than  $50.65^{\circ}\text{N}$ . The red line represents the linear regression line ( $n=32275$ ). A two-sided  $F$ -test is used to test whether the slope equals zero. \*\*:  $p < 0.01$ .

**Supplementary Table 1** | Examples of studies examining the correlation between chilling accumulation and heat requirement of spring phenology.

| Year | Species                      | Event          | Region       | Method      | Ref           |
|------|------------------------------|----------------|--------------|-------------|---------------|
| 1983 | <i>Picea sitchensis</i>      | Budburst       | UK           | Observation | <sup>1</sup>  |
| 1989 | 15 species                   | Budburst       | UK           | Experiment  | <sup>2</sup>  |
| 1993 | 9 species                    | Budburst       | Norway       | Experiment  | <sup>3</sup>  |
| 1993 | <i>Carya illinoensis</i>     | Budburst       | USA          | Experiment  | <sup>4</sup>  |
| 1995 | 2 species                    | Bud-burst      | Norway       | Experiment  | <sup>5</sup>  |
| 2005 | 2 species                    | Leaf unfolding | Norway       | Experiment  | <sup>6</sup>  |
| 2009 | <i>Euphorbia elula</i>       | Flowering      | USA          | Experiment  | <sup>7</sup>  |
| 2010 | <i>Euphorbia elula</i>       | Flowering      | USA          | Experiment  | <sup>8</sup>  |
| 2010 | <i>Pseudotsuga menziesii</i> | Budburst       | USA          | Experiment  | <sup>9</sup>  |
| 2011 | 4 species                    | Budburst       | UK           | Experiment  | <sup>10</sup> |
| 2011 | <i>Prunus armeniaca</i>      | Budburst       | South Africa | Experiment  | <sup>11</sup> |
| 2011 | <i>Prunus persica</i>        | Budburst       | USA          | Experiment  | <sup>12</sup> |
| 2011 | <i>Betula pubescens</i>      | Budburst       | UK           | Experiment  | <sup>13</sup> |
| 2013 | 3 species                    | Leaf unfolding | Belgium      | Experiment  | <sup>14</sup> |
| 2013 | 2 species                    | Leaf unfolding | France       | Observation | <sup>15</sup> |
| 2014 | 36 species                   | Budburst       | Germany      | Experiment  | <sup>16</sup> |
| 2014 | <i>Picea abies</i>           | Budburst       | Finland      | Experiment  | <sup>17</sup> |
| 2015 | 13 species                   | Leaf unfolding | Europe       | Observation | <sup>18</sup> |
| 2015 | 2 species                    | Budburst       | UK           | Experiment  | <sup>19</sup> |
| 2017 | 7 species                    | Budburst       | Canada       | Experiment  | <sup>20</sup> |
| 2017 | 6 species                    | Budburst       | USA          | Experiment  | <sup>21</sup> |
| 2018 | 28 species                   | Budburst       | USA, Canada  | Experiment  | <sup>22</sup> |
| 2019 | 2 species                    | Leaf unfolding | Belgium      | Experiment  | <sup>23</sup> |
| 2019 | <i>Leymus chinensis</i>      | Leaf unfolding | China        | Experiment  | <sup>24</sup> |

**Supplementary Table 2** | List of 91 perennials with negative correlations between chilling accumulation and the heat requirement of spring phenology.

| Plant type                  | Number | Species                                                                                                                                                                                                                                                                                                                                                                                                                                                                                                                                                                                                                                                                                                                                                                                                                                                                                                                                                                                                                                                                                                                                                                                                                                                                                                                                                                                                                               |
|-----------------------------|--------|---------------------------------------------------------------------------------------------------------------------------------------------------------------------------------------------------------------------------------------------------------------------------------------------------------------------------------------------------------------------------------------------------------------------------------------------------------------------------------------------------------------------------------------------------------------------------------------------------------------------------------------------------------------------------------------------------------------------------------------------------------------------------------------------------------------------------------------------------------------------------------------------------------------------------------------------------------------------------------------------------------------------------------------------------------------------------------------------------------------------------------------------------------------------------------------------------------------------------------------------------------------------------------------------------------------------------------------------------------------------------------------------------------------------------------------|
| Deciduous broadleaved shrub | 23     | <i>Acer tataricum</i> , <i>Aronia melanocarpa</i> , <i>Cornus alba</i> , <i>Cornus mas</i> , <i>Corylus avellana</i> , <i>Crataegus monogyna</i> , <i>Hamamelis virginiana</i> , <i>Ilex mucronatus</i> , <i>Kalmia angustifolia</i> , <i>Lonicera canadensis</i> , <i>Lyonia ligustrina</i> , <i>Rhamnus frangula</i> , <i>Rhododendron prinophyllum</i> , <i>Rosa rugosa</i> , <i>Rubus idaeus</i> , <i>Salix viminalis</i> , <i>Spiraea alba</i> , <i>Symphoricarpos albus</i> , <i>Syringa chinensis</i> , <i>Syringa vulgaris</i> , <i>Vaccinium myrtilloides</i> , <i>Viburnum cassinoides</i> , <i>Viburnum lantanoides</i>                                                                                                                                                                                                                                                                                                                                                                                                                                                                                                                                                                                                                                                                                                                                                                                                    |
| Deciduous broadleaved tree  | 52     | <i>Acer negundo</i> , <i>Acer pensylvanicum</i> , <i>Acer platanoides</i> , <i>Acer pseudoplatanus</i> , <i>Acer rubrum</i> , <i>Acer saccharum</i> , <i>Aesculus hippocastanum</i> , <i>Alnus glutinosa</i> , <i>Alnus incana</i> , <i>Alnus incana</i> subsp. <i>rugosa</i> , <i>Betula alleghaniensis</i> , <i>Betula lenta</i> , <i>Betula papyrifera</i> , <i>Betula pendula</i> , <i>Betula pubescens</i> , <i>Carpinus betulus</i> , <i>Carya illinoensis</i> , <i>Fagus grandifolia</i> , <i>Fagus sylvatica</i> , <i>Fraxinus chinensis</i> , <i>Fraxinus excelsior</i> , <i>Fraxinus nigra</i> , <i>Juglans ailantifolia</i> , <i>Juglans cinerea</i> , <i>Juglans regia</i> , <i>Malus</i> sp.(apple), <i>Nyssa sylvatica</i> , <i>Populus balsamifera</i> , <i>Populus deltoides</i> , <i>Populus grandidentata</i> , <i>Populus tremula</i> , <i>Populus tremuloides</i> , <i>Populus trichocarpa</i> , <i>Prunus armeniaca</i> (apricot), <i>Prunus avium</i> , <i>Prunus padus</i> , <i>Prunus pensylvanica</i> , <i>Prunus persica</i> (Peach), <i>Prunus serotina</i> , <i>Pyrus communis</i> (pear), <i>Quercus alba</i> , <i>Quercus bicolor</i> , <i>Quercus ellipsoidalis</i> , <i>Quercus petraea</i> , <i>Quercus robur</i> , <i>Quercus rubra</i> , <i>Quercus velutina</i> , <i>Robinia pseudoacacia</i> , <i>Salix × smithiana</i> , <i>Sambucus nigra</i> , <i>Sorbus aucuparia</i> , <i>Tilia cordata</i> |
| Deciduous coniferous tree   | 2      | <i>Larix decidua</i> , <i>Larix laricina</i>                                                                                                                                                                                                                                                                                                                                                                                                                                                                                                                                                                                                                                                                                                                                                                                                                                                                                                                                                                                                                                                                                                                                                                                                                                                                                                                                                                                          |
| Evergreen coniferous tree   | 12     | <i>Abies alba</i> , <i>Tsuga heterophylla</i> , <i>Picea abies</i> , <i>Picea glauca</i> , <i>Picea mariana</i> , <i>Picea sitchensis</i> , <i>Pinus banksiana</i> , <i>Pinus contorta</i> , <i>Pinus strobus</i> , <i>Pinus sylvestris</i> , <i>Pinus wallichiana</i> , <i>Pseudotsuga menziesii</i>                                                                                                                                                                                                                                                                                                                                                                                                                                                                                                                                                                                                                                                                                                                                                                                                                                                                                                                                                                                                                                                                                                                                 |
| Herbaceous perennial        | 2      | <i>Leymus chinensis</i> , <i>Euphorbia elula</i>                                                                                                                                                                                                                                                                                                                                                                                                                                                                                                                                                                                                                                                                                                                                                                                                                                                                                                                                                                                                                                                                                                                                                                                                                                                                                                                                                                                      |

All perennials are extracted from the studies listed in Supplementary Table 1.

**Supplementary Table 3** | Summary of species and spring events investigated in this study.

| No. | Species                         | BBCH | Plant type | No. of stations | No. of records |
|-----|---------------------------------|------|------------|-----------------|----------------|
| 1   | <i>Acer platanoides</i> *       | 60   | Tree       | 2674            | 80084          |
| 2   | <i>Acer pseudoplatanus</i> *    | 11   | Tree       | 76              | 1578           |
| 3   | <i>Aesculus hippocastanum</i> * | 11   | Tree       | 3942            | 129530         |
| 4   | <i>Alnus glutinosa</i> *        | 11   | Tree       | 2477            | 72152          |
| 5   | <i>Alopecurus pratensis</i>     | 60   | Herb       | 1059            | 23072          |
| 6   | <i>Artemisia vulgaris</i>       | 60   | Herb       | 800             | 15953          |
| 7   | <i>Betula pendula</i> *         | 11   | Tree       | 3912            | 127990         |
| 8   | <i>Calluna vulgaris</i>         | 60   | Shrub      | 2655            | 80681          |
| 9   | <i>Cornus mas</i> *             | 60   | Shrub      | 40              | 1271           |
| 10  | <i>Corylus avellana</i> *       | 60   | Shrub      | 3466            | 108820         |
| 11  | <i>Dactylis glomerata</i>       | 60   | Herb       | 225             | 5243           |
| 12  | <i>Fagus sylvatica</i> *        | 11   | Tree       | 3321            | 103450         |
| 13  | <i>Forsythia suspense</i>       | 60   | Shrub      | 3023            | 92325          |
| 14  | <i>Fraxinus excelsior</i> *     | 11   | Tree       | 2415            | 72315          |
| 15  | <i>Galanthus nivalis</i>        | 60   | Herb       | 4178            | 139530         |
| 16  | <i>Larix decidua</i> *          | 10   | Tree       | 2968            | 92415          |
| 17  | <i>Picea abies</i> *            | 10   | Tree       | 3185            | 100960         |
| 18  | <i>Pinus sylvestris</i> *       | 10   | Tree       | 2699            | 78768          |
| 19  | <i>Prunus avium</i> *           | 69   | Tree       | 684             | 12887          |
| 20  | <i>Prunus spinosa</i>           | 60   | Shrub      | 3013            | 97249          |
| 21  | <i>Quercus robur</i> *          | 11   | Tree       | 3394            | 106650         |
| 22  | <i>Ribes rubrum</i>             | 60   | Shrub      | 3359            | 100030         |
| 23  | <i>Robinia pseudoacacia</i> *   | 60   | Tree       | 2638            | 77764          |
| 24  | <i>Salix caprea</i>             | 60   | Shrub      | 3828            | 125450         |
| 25  | <i>Sambucus nigra</i> *         | 60   | Shrub      | 4115            | 129710         |
| 26  | <i>Sorbus aucuparia</i> *       | 11   | Shrub      | 1192            | 25877          |
| 27  | <i>Syringa vulgaris</i> *       | 60   | Shrub      | 4177            | 139020         |
| 28  | <i>Taraxacum officinale</i>     | 60   | Herb       | 3954            | 130740         |
| 29  | <i>Tilia platyphyllos</i>       | 60   | Tree       | 3351            | 105330         |
| 30  | <i>Tussilago farfara</i>        | 60   | Herb       | 3742            | 116800         |

The BBCH scale is used to identify the phenological events of plants: 10, first leaves separated; 11, first leaves unfolded; 60, first flowers open; and 69, end of flowering. \*: the species which have been proved to have a negative relationship between HR and CA based on previous studies.

## References

1. Cannell, M. G. R. & Smith, R. I., Thermal time, chill days and prediction of budburst in *Picea sitchensis*. *J. Appl. Ecol.* **20**, 951-963 (1983).
2. Murray, M. B., Cannell, M. & Smith, R. I., Date of budburst of fifteen tree species in Britain following climatic warming. *J. Appl. Ecol.* **26**, 693-700 (1989).
3. Heide, O. M., Daylength and thermal time responses of budburst during dormancy release in some northern deciduous trees. *Physiol. Plantarum* **88**, 531-540 (1993).
4. Sparks, D., Chilling and heating model for pecan budbreak. *J. Am. Soc. Hortic. Sci.* **118**, 29-35 (1993).
5. Myking, T. & Heide, O. M., Dormancy release and chilling requirement of buds of latitudinal ecotypes of *Betula pendula* and *B. pubescens*. *Tree Physiol.* **15**, 697-704 (1995).
6. Heide, O. M. & Prestrud, A. K., Low temperature, but not photoperiod, controls growth cessation and dormancy induction and release in apple and pear. *Tree Physiol.* **25**, 109-114 (2005).
7. Foley, M. E., Anderson, J. V. & Horvath, D. P., The effects of temperature, photoperiod, and vernalization on regrowth and flowering competence in *Euphorbia esula* (Euphorbiaceae) crown buds. *Botany* **87**, 986-992 (2009).
8. Dogramaci, M. et al., Low temperatures impact dormancy status, flowering competence, and transcript profiles in crown buds of leafy spurge. *Plant Mol. Biol.* **73**, 207-226 (2010).
9. Harrington, C. A., Gould, P. J. & St Clair, J. B., Modeling the effects of winter environment on dormancy release of Douglas-fir. *Forest Ecol. Manag.* **259**, 798-808 (2010).
10. Caffarra, A. & Donnelly, A., The ecological significance of phenology in four different tree species: effects of light and temperature on bud burst. *Int. J. Biometeorol.* **55**, 711-721 (2011).
11. Campoy, J. A., Ruiz, D., Cook, N., Alderman, L. & Egea, J., High temperatures and time to budbreak in low chill apricot 'Palsteyn'. Towards a better understanding of chill and heat requirements fulfilment. *Sci. Hortic.-Amsterdam* **129**, 649-655 (2011).
12. Okie, W. R. & Blackburn, B., Increasing chilling reduces heat requirement for floral budbreak in Peach. *Hortscience* **46**, 245-252 (2011).
13. Caffarra, A., Donnelly, A., Chuine, I. & Jones, M. B., Modelling the timing of *Betula pubescens* budburst. I. Temperature and photoperiod: a conceptual model. *Clim. Res.* **46**, 147-157 (2011).
14. Fu, Y. H., Campioli, M., Deckmyn, G. & Janssens, I. A., Sensitivity of leaf unfolding to experimental warming in three temperate tree species. *Agr. Forest Meteorol.* **181**, 125-132 (2013).
15. Vitasse, Y. & Basler, D., What role for photoperiod in the bud burst phenology of European beech. *Eur. J. Forest Res.* **132**, 1-8 (2013).
16. Laube, J. et al., Chilling outweighs photoperiod in preventing precocious spring development. *Global Change Biol.* **20**, 170-182 (2014).
17. Vihera-Aarnio, A., Sutinen, S., Partanen, J. & Hakkinen, R., Internal development of vegetative buds of Norway spruce trees in relation to accumulated chilling and forcing temperatures. *Tree Physiol.* **34**, 547-556 (2014).
18. Fu, Y. H. et al., Increased heat requirement for leaf flushing in temperate woody species over 1980-2012: effects of chilling, precipitation and insolation. *Global Change Biol.* **21**, 2687-2697 (2015).
19. Pletsers, A., Caffarra, A., Kelleher, C. T. & Donnelly, A., Chilling temperature and photoperiod influence the timing of bud burst in juvenile *Betula pubescens* Ehrh. and *Populus tremula* L. trees.

*Ann. Forest Sci.* **72**, 941-953 (2015).

20. Man, R., Lu, P. & Dang, Q., Insufficient chilling effects vary among boreal tree species and chilling duration. *Front. Plant Sci.* **8**, 1354 (2017).
21. Nanninga, C., Buyarski, C. R., Pretorius, A. M. & Montgomery, R. A., Increased exposure to chilling advances the time to budburst in North American tree species. *Tree Physiol.* **37**, 1727-1738 (2017).
22. Flynn, D. F. B. & Wolkovich, E. M., Temperature and photoperiod drive spring phenology across all species in a temperate forest community. *New Phytol.* **219**, 1353-1362 (2018).
23. Fu, Y. H. et al., Short photoperiod reduces the temperature sensitivity of leaf-out in saplings of *Fagus sylvatica* but not in horse chestnut. *Global Change Biol.* **25**, 1696-1703 (2019).
24. Huang, W., Ge, Q., Wang, H. & Dai, J., Effects of multiple climate change factors on the spring phenology of herbaceous plants in Inner Mongolia, China: Evidence from ground observation and controlled experiments. *Int. J. Climatol.* **39**, 5140-5153 (2019).
